# Supplementary material for: Quantifying Cell Fate Decisions for Differentiation and Reprogramming of a Human Stem Cell Network: Landscape and Biological Paths
Source: PLOS journal article supplement (doi:10.1371/journal.pcbi.1003165), 2013-08-01
Supplement: S6 (10.1371/journal.pcbi.1003165.s006) [file journal.pcbi.1003165.s006]

**Table.S 2. Repression link names in the sensitivity analysis and the corresponding regulations they represent.** The order numbers for causal and target genes are shown, which are corresponding to the gene name in Table S1.

| Link Name | Causal Genes | Target Genes |
|-----------|--------------|--------------|
| R1        | 22           | 1            |
| R2        | 1            | 16           |
| R3        | 3            | 16           |
| R4        | 15           | 16           |
| R5        | 35           | 16           |
| R6        | 46           | 16           |
