# Supplementary material for: Quantifying Cell Fate Decisions for Differentiation and Reprogramming of a Human Stem Cell Network: Landscape and Biological Paths
Source: PLOS journal article supplement (doi:10.1371/journal.pcbi.1003165), 2013-08-01
Supplement: S8 (10.1371/journal.pcbi.1003165.s008) [file journal.pcbi.1003165.s008]

**Table.S 4. Differentiation path characterized by high/low expression level of 22 marker genes in Figure 3 of main text.** The line of gene ID represent the corresponding genes in Table S1. From the line stem cell to line differentiation, every line represents a cellular states. Stem cell represent the stem cell states, and differentiation represents differentiation states. 1 denotes high expression level, and 0 represents low expression level.

[illegible]
