# Supplementary material for: Quantifying Cell Fate Decisions for Differentiation and Reprogramming of a Human Stem Cell Network: Landscape and Biological Paths
Source: PLOS journal article supplement (doi:10.1371/journal.pcbi.1003165), 2013-08-01
Supplement: S12 (10.1371/journal.pcbi.1003165.s012) [file journal.pcbi.1003165.s012]

301 Moved Permanently

# Moved Permanently

The document has moved here.

---

Apache Server at www.ploscompbiol.org Port 80
